# Supplementary material for: Post-Synthesis Modification of Photoluminescent and Electrochemiluminescent Au Nanoclusters with Dopamine
Source: Nanomaterials (Basel). 2020 Dec 27;11(1):46. doi: 10.3390/nano11010046 (PMC7824466; doi:10.3390/nano11010046)
Supplement: Supplementary file 1 [file nanomaterials-11-00046-s001.pdf]

## **Supporting Information**

### **Post-synthesis Modification of Photoluminescent and Electrochemiluminescent Au Nanoclusters with Dopamine**

Jae Hyun Kim <sup>1</sup> and Joohoon Kim <sup>1,2,\*</sup>

<sup>1</sup> Department of Chemistry, Research Institute for Basic Sciences, Kyung Hee University, Seoul 02447, Republic of Korea

<sup>2</sup> KHU-KIST Department of Converging Science and Technology, Kyung Hee University, Seoul 02447, Republic of Korea

**\*Corresponding Author: [jkim94@khu.ac.kr](mailto:jkim94@khu.ac.kr) (J. Kim)**

#### **Table of Contents:**

Supporting Figures S1-S3

S2 – S4

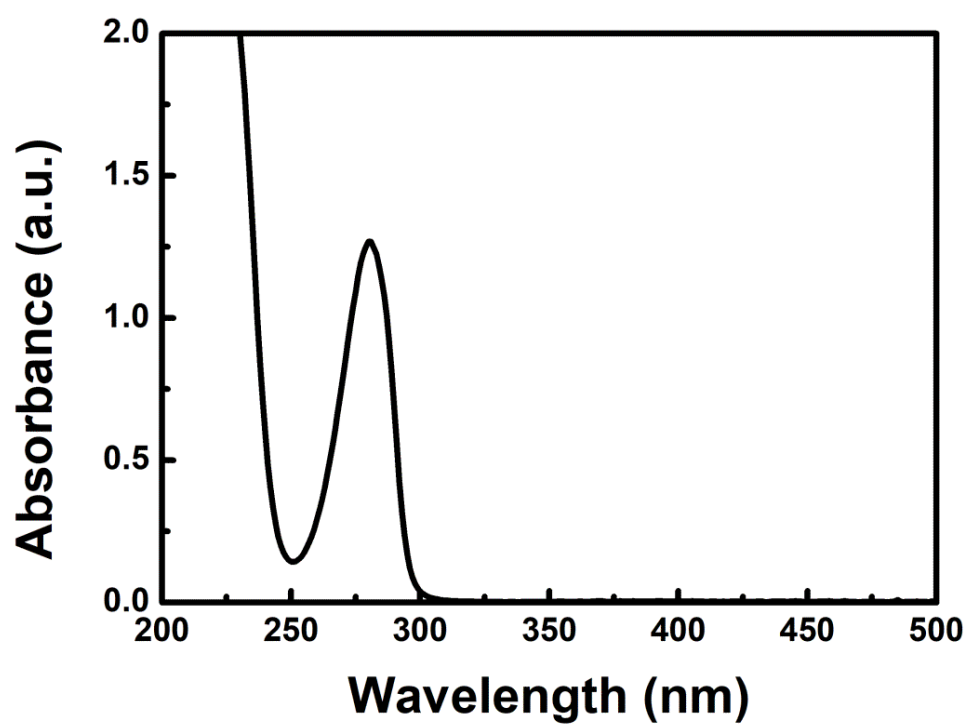

**Figure S1.** UV-vis absorption spectrum of free dopamine.

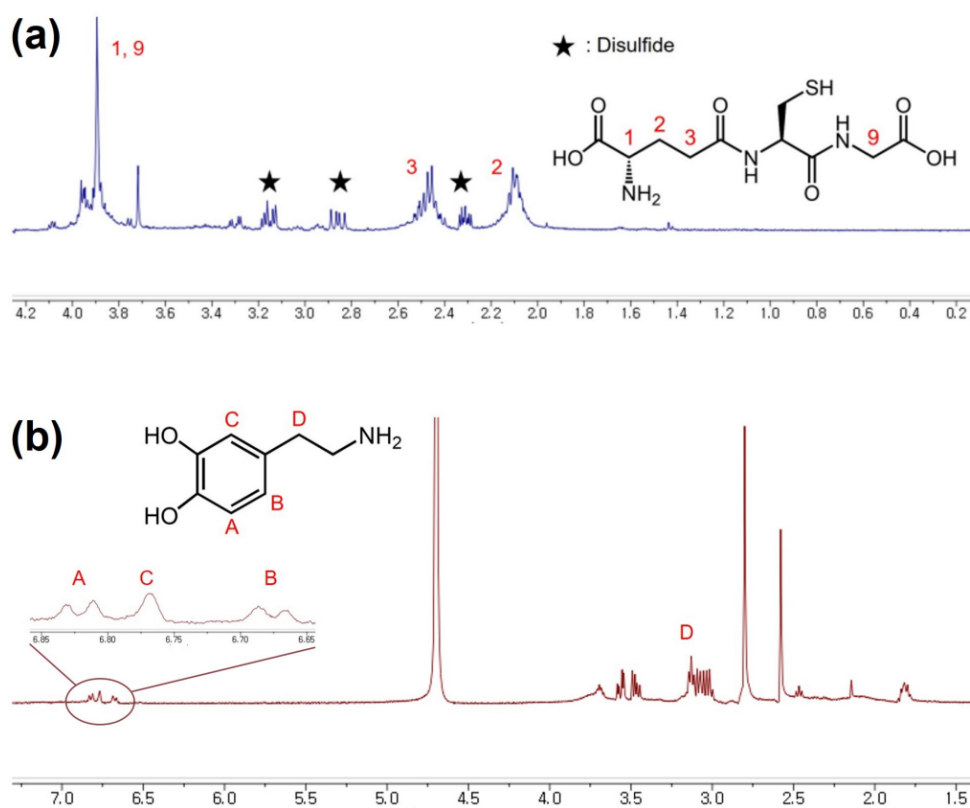

**Figure S2.**  $^1\text{H}$  NMR spectra of (a) as-synthesized Au NCs and (b) dopamine-conjugated Au NCs. NMR samples were prepared by dissolving clusters in  $\text{D}_2\text{O}$ .

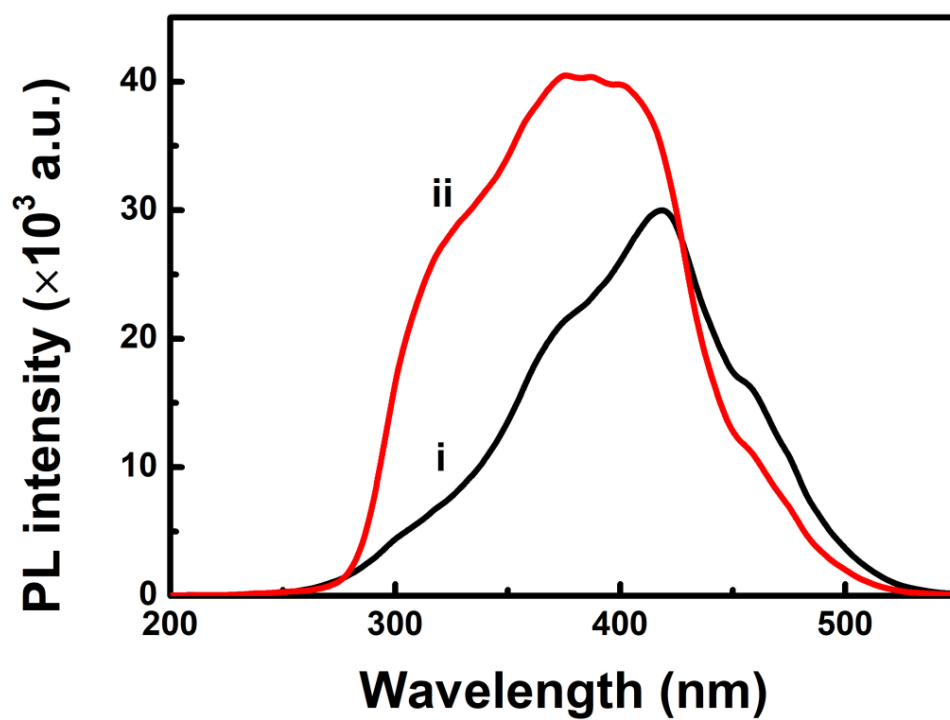

**Figure S3.** PL excitation spectra of (i) as-synthesized Au NCs and (ii) dopamine-conjugated Au NCs.  $\lambda_{\text{em}} = 610$  nm.
